# Supplementary material for: One-step thermal polymerization synthesis of nitrogen-rich g-C3N4 nanosheets enhances photocatalytic redox activity
Source: Royal Society of Chemistry journal article supplement (doi:10.1039/d2ra05867g), 2022-01-01
Supplement: d2ra05867g1.pdf [file d2ra05867g1.pdf]

## Supporting Information

### One-step thermal polymerization synthesis of nitrogen-rich g-C<sub>3</sub>N<sub>4</sub> nanosheets enhances photocatalytic redox activity

Leyu Peng,<sup>a</sup> Jiaxi Liu,<sup>a,b</sup> Ziyuan Li,<sup>a</sup> Yifan Jing,<sup>a</sup> Yongjin Zou,<sup>a</sup> Hailiang Chu,<sup>a</sup> Fen Xu,<sup>a</sup> Lixian Sun,<sup>\*a,b</sup> and Pengru Huang<sup>\*a</sup>

### Experimental section

#### *Characterizations*

The characterization test equipment used in this experiment is as follows: X-ray powder diffractometer (XRD; Cu K $\alpha$  radiation, Bruker DAVINCI D8 ADVANCE diffractometer) were analyzed the crystal structure; X-ray Photoelectron Spectrometer (XPS; ESCALAB 250Xi, Thermo Fisher) analyzed elemental compositions and chemical states; Fourier Transform Infrared Measurements (FTIR; 6700, Nicolet) spectra to use analyze surface functional groups; Scanning electron microscope (SEM; Quanta 200, FEI) and transmission electron microscope (TEM; Talos F200X, FEI Company, USA) were observed the surface morphology; Diffuse reflectance ultraviolet-visible spectra (UV-vis DRS; Metash UV-8000) were collected the visible light absorption information with BaSO<sub>4</sub> reference; Brunauer-Emmett-Teller (BET; Autosorb iQ2, Quantachrome, USA) were determined specific surface areas and pore structure of all the samples; The steady photoluminescence (PL) spectra and time-correlated single-photon counting (TCSPC) were measured under 310 nm excitation; Electron Spin Resonance (ESR) spectra of samples were measured on a ESR spectrometer (Bruker EMX PLUS, Germany), after dispersing 2 mg sample into mixture of 100  $\mu$ l deionized water containing 20  $\mu$ l 5,5-dimethyl-1-pyrrolidine N-oxide (DMPO) of 0.19 M and irradiated for 10 min under visible light ( $\lambda > 420$  nm), for detection of  $\bullet$ OH.

The photo-electrochemical (EIS and TPS) were conducted on an electrochemical workstation (CHI 660E,) employing a three-electrode system (a Pt counter electrode, an Ag/AgCl reference electrode, and a working electrode). The working electrode was

prepared as follows: 2 mg of samples were dispersed in a mixed solution which includes 100  $\mu\text{L}$  of ethyl alcohol and 5  $\mu\text{L}$  of Nafion and sonicated for an hour; then the slurry was equally dip-coated onto ITO glass and dried.

#### ***Photocatalytic activity measurement***

Rhodamine B (RhB) was selected as the target pollutant in photo-degradation experiments. 10 mg photocatalysts were scattered to 50 ml RhB solution (20 ppm). The catalyst was first adsorbed in the dark for 30 minutes before visible light irradiation (300 W Xenon lamp,  $\lambda > 420$  nm), after that, every 10 min interval, 4 ml of the suspension were extracted and centrifuged to obtain the supernatant. And the solution was analyzed through a UV-vis spectrophotometer (UV-8000, ranging from 380-700 nm).

The  $\text{H}_2$  evolution activity of different samples was tested to study the photocatalytic reduction activity. 20 mg photocatalysts were firstly dispersed into a 100 ml solution (20% volume TEOA and 160  $\mu\text{l}$  10 mg/ml  $\text{H}_2\text{PtCl}_6 \cdot 6\text{H}_2\text{O}$ ), the resulting suspension was degassed for 30 min (vacuum condition), and then photo-deposition was used to prepare the catalyst with supported Pt. After degassing again for 30 min to eliminate residual gas, then periodically sample the  $\text{H}_2$  generation.

#### ***Calculations of density functional theory (DFT)***

All the theoretical calculations were performed based on the density functional theory (DFT) by means of the Vienna Ab-initio Simulation Package (VASP), with the projected augmented wave (PAW) method.<sup>1</sup> The Perdew-Burke-Ernzerhof (PBE) functional within the generalized gradient approximation (GGA) is used to describe the exchange-correlation potential.<sup>2-3</sup> The van der Waals was considered via Grimme's DFT-D3 method. The kinetic energy cutoff is set to 500 eV. During the geometry optimizations, the convergence criteria for force and energy were set to 0.02 eV/Å and  $1 \times 10^{-5}$  eV, respectively. The vacuum layer was set to 20 Å. The Brillouin-zone was sampled by the gamma-centered Monkhorst-Pack method with a  $5 \times 5 \times 1$  k-point mesh.

## Results

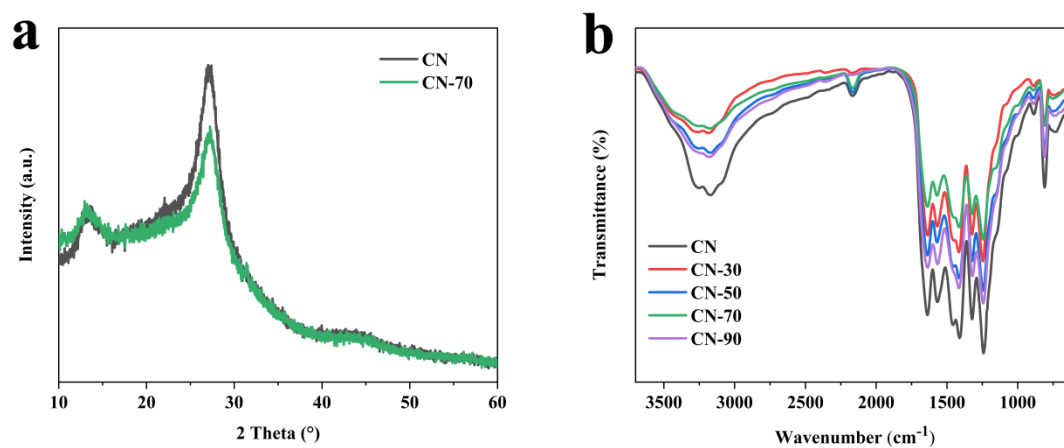

**Fig. S1**(a) The XRD patterns of CN and CN-70 (b) The FT-IR spectra peak intensity of all the samples.

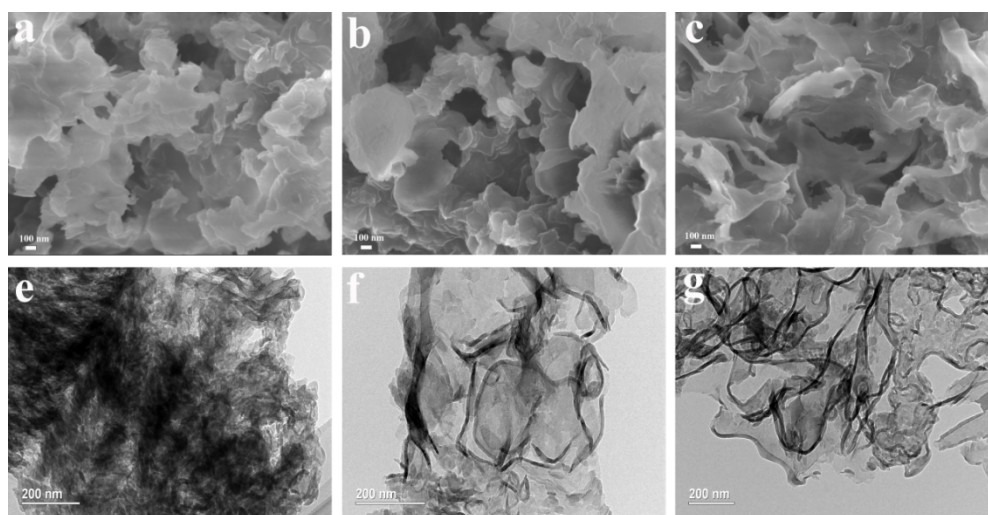

**Fig.S2** The SEM images of (a) CN, (b)-(c) CN-70 and TEM images of (e) CN, (f)-(g) CN-70.

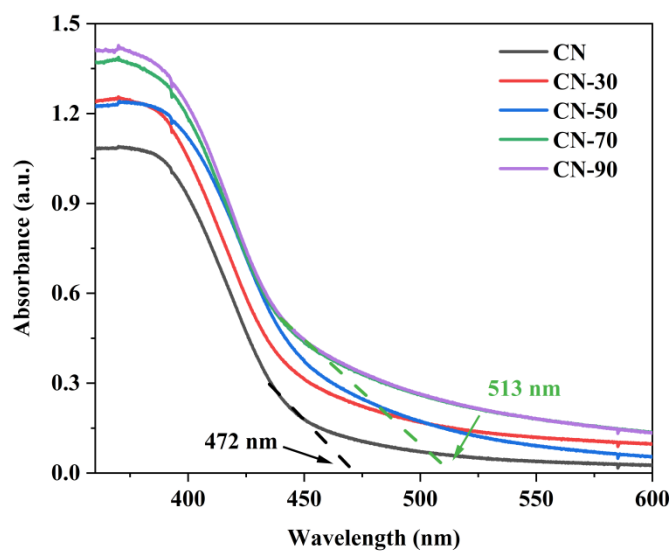

**Fig. S3** The UV-vis DRS spectra of all the samples.

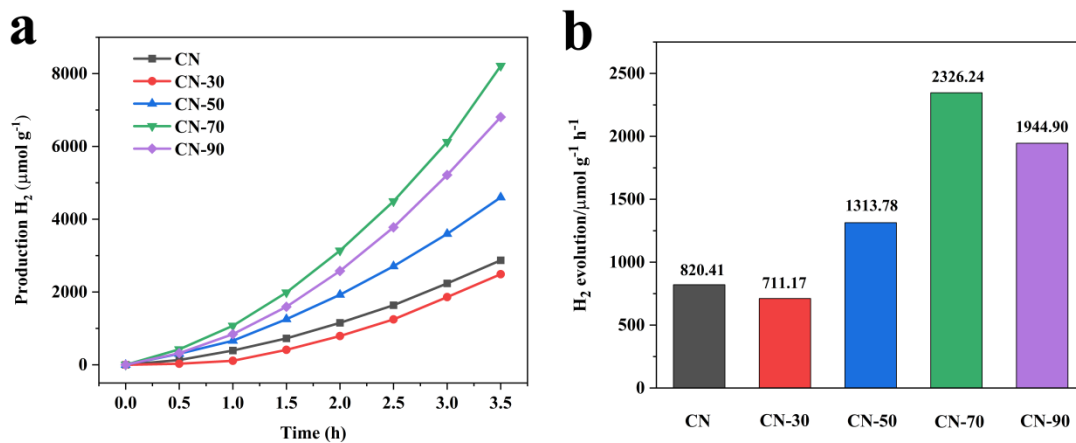

**Fig. S4** (a) Amount of H<sub>2</sub> generation (b) H<sub>2</sub> generation rate of the CN and CN-X.

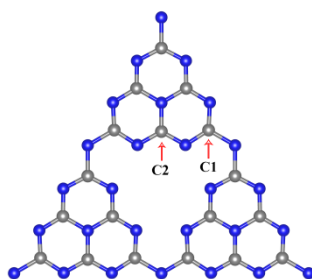

**Fig. S5** Structural model of g-C<sub>3</sub>N<sub>4</sub> (CN) with two possible C sites (C and N are indicated by grey and blue spheres).

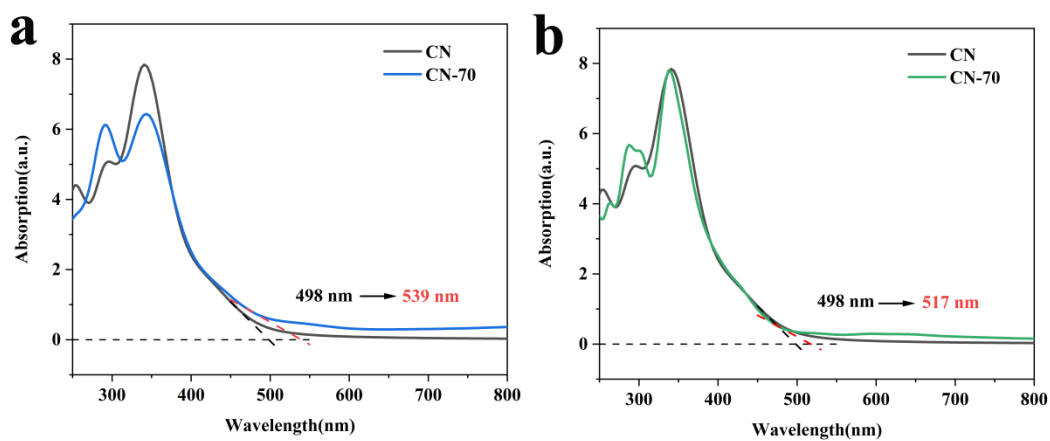

**Fig. S6** Calculations of the visible light absorption spectrum of (a) CN-70(C1) and (b) CN-70(C2).

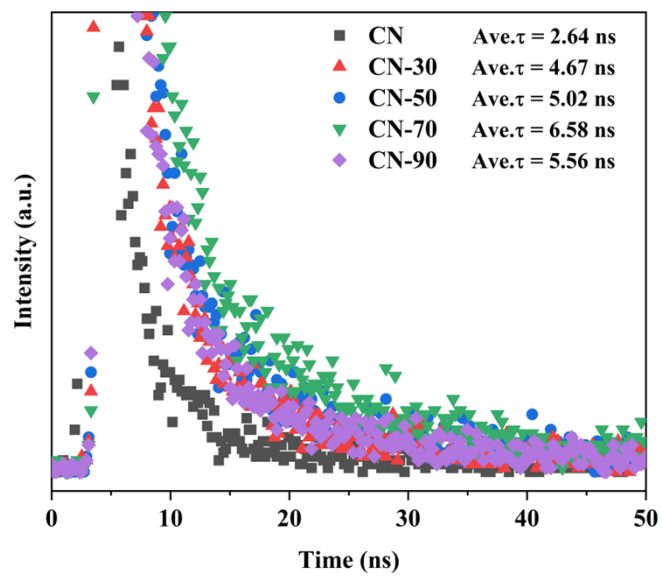

Fig.S7 The transient PL of CN and CN-X.

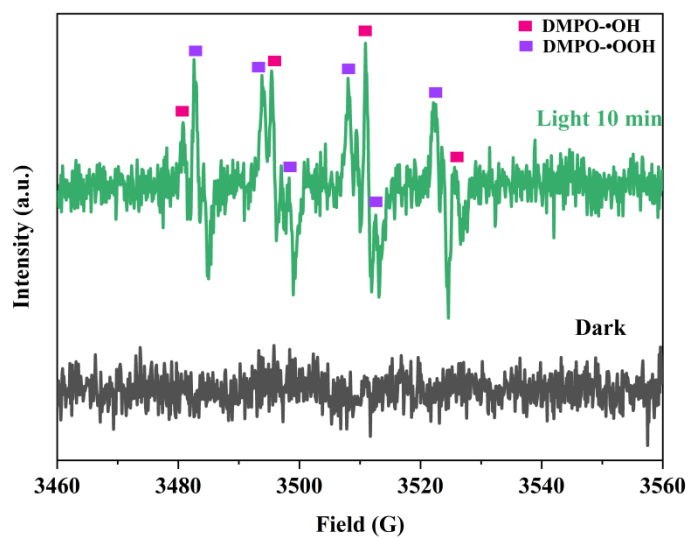

Fig.S8 The ESR results of CN-70 in the darkness and visible light irradiation.

**Table S1.** Specific surface area, pore size distribution and pore volume of samples

| <b>Sample</b> | <b>Surface area<br/>(m<sup>2</sup>/g)</b> | <b>Pore diameter<br/>(nm)</b> | <b>Pore volume<br/>(cm<sup>3</sup>/g)</b> |
|---------------|-------------------------------------------|-------------------------------|-------------------------------------------|
| CN            | 58.499                                    | 21.982                        | 0.321                                     |
| CN-30         | 77.205                                    | 28.055                        | 0.551                                     |
| CN-50         | 83.875                                    | 25.934                        | 0.544                                     |
| CN-70         | 86.532                                    | 36.263                        | 0.784                                     |
| CN-90         | 79.436                                    | 31.260                        | 0.621                                     |

**Table S2.** XPS analysis of C1s for CN and CN-70

| <b>Sample</b> | <b>C-C/C=C</b> | <b>N=C-N</b> |
|---------------|----------------|--------------|
| CN            | 52.46%         | 47.54%       |
| CN-70         | 37.62%         | 62.38%       |

**Table S3.** XPS analysis of N1s for CN and CN-70

| <b>Sample</b> | <b>C-N=C</b> | <b>N<sub>3</sub>C-low<br/>binding<br/>energy</b> | <b>N<sub>3</sub>C-high<br/>binding<br/>energy</b> | <b>-NH<sub>2</sub>/N-N</b> |
|---------------|--------------|--------------------------------------------------|---------------------------------------------------|----------------------------|
| CN            | 58.13%       | 21.94%                                           | 11.17%                                            | 8.36%                      |
| CN-70         | 62.13%       | 16.22%                                           | 11.91%                                            | 9.74%                      |

**Table S4.** Fitting results of the photoluminescence decay time

| <b>Sample</b> | <b><math>\tau</math>1/ns</b> | <b>Rel%</b> | <b><math>\tau</math>2/ns</b> | <b>Rel%</b> | <b>average <math>\tau</math>/ns</b> |
|---------------|------------------------------|-------------|------------------------------|-------------|-------------------------------------|
| CN            | 0.8596                       | 54.15       | 4.7451                       | 45.85       | 2.6411                              |
| CN-30         | 1.4046                       | 56.85       | 8.9684                       | 43.15       | 4.6684                              |
| CN-50         | 1.4659                       | 57.28       | 9.7911                       | 42.72       | 5.0224                              |
| CN-70         | 1.6945                       | 52.35       | 11.9531                      | 47.65       | 6.5827                              |
| CN-90         | 1.4817                       | 57.87       | 11.1571                      | 42.13       | 5.5579                              |

**Table S5.** RhB degradation rate of g-C<sub>3</sub>N<sub>4</sub> based photocatalysts reported by literature.

| Photocatalysts                                     | Light source       | Reaction conditions   | RhB degradation rate k (min <sup>-1</sup> ) | Ref.      |
|----------------------------------------------------|--------------------|-----------------------|---------------------------------------------|-----------|
| P@P-g-C <sub>3</sub> N <sub>4</sub>                | $\lambda > 420$ nm | 50mg<br>100ml 10mg/l  | 0.0659                                      | [4]       |
| 60-C <sub>3</sub> N <sub>4</sub>                   | $\lambda > 420$ nm | 12mg<br>60ml 10mg/l   | 0.0434                                      | [5]       |
| 1D/2D O-doped g-C <sub>3</sub> N <sub>4</sub>      | $\lambda > 420$ nm | 100mg<br>100ml 30mg/l | 0.0551                                      | [6]       |
| SN-GQDs/g-C <sub>3</sub> N <sub>4</sub>            | $\lambda > 420$ nm | 50mg<br>100ml 5mg/l   | 0.0388                                      | [7]       |
| Porous-g-C <sub>3</sub> N <sub>4</sub>             | $\lambda > 420$ nm | 10mg<br>50ml 10mg/l   | 0.04559                                     | [8]       |
| few-layered porous g-C <sub>3</sub> N <sub>4</sub> | $\lambda > 420$ nm | 25mg<br>50ml 10mg/l   | 0.027                                       | [9]       |
| CN-70                                              | $\lambda > 420$ nm | 10mg<br>50ml 20mg/l   | 0.06274                                     | This work |

**Table S6.** The H<sub>2</sub> evolution rate of g-C<sub>3</sub>N<sub>4</sub> based photocatalysts reported by literature.

| Photocatalysts                                     | Light source       | Reaction conditions         | H <sub>2</sub> evolution rate ( $\mu$ mol/g/h) | Ref.      |
|----------------------------------------------------|--------------------|-----------------------------|------------------------------------------------|-----------|
| P@P-g-C <sub>3</sub> N <sub>4</sub>                | $\lambda > 420$ nm | 3 wt% Pt, TEOA<br>(10 vol%) | 941.80                                         | [4]       |
| few-layered porous g-C <sub>3</sub> N <sub>4</sub> | $\lambda > 420$ nm | 3 wt% Pt, TEOA<br>(10 vol%) | 304                                            | [8]       |
| SS-CN                                              | $\lambda > 420$ nm | 1 wt% Pt, TEOA<br>(10 vol%) | 982.33                                         | [10]      |
| BP-g-C <sub>3</sub> N <sub>4</sub>                 | $\lambda > 420$ nm | 1 wt% Pt, TEOA<br>(10 vol%) | 1900                                           | [11]      |
| K-doped g-C <sub>3</sub> N <sub>4</sub>            | $\lambda > 420$ nm | 3 wt% Pt, TEOA<br>(10 vol%) | 1337                                           | [12]      |
| few-layer C <sub>3</sub> N <sub>4</sub>            | $\lambda > 420$ nm | 3 wt% Pt, TEOA<br>(10 vol%) | 159.8                                          | [13]      |
| CN-70                                              | $\lambda > 420$ nm | 3 wt% Pt, TEOA<br>(10 vol%) | 2326.24                                        | This work |

## References

- 1 J. P. Perdew, K. Burke and M. Ernzerhof, *Phys. Rev. Lett.*, 1996, **77**(18), 3865–3868.
- 2 Raziq. F, Hayat. A, Humayun. M, et al. *Appl. Catal. B-Environ.*, 2020, **270**, 118867.
- 3 She. X, Liu. L, Ji. H, M. Li, Y. Huang, L, Du, D. Xu, H. Li, H et al. *Appl. Catal. B-Environ.*, 2016, **187**, 144-153.
- 4 J. Feng, D. Zhang, H. Zhou, M. Pi, X. Wang, S. Chen, *ACS Sustain. Chem. Eng.*, 2018, **6**, 6342-6349.
- 5 C. Feng, L. Tang, Y. Deng, J. Wang, Y. Liu, X. Ouyang, H. Yang, J. Yu, J. Wang, *Appl Catal. B-Environ.*, 2021, **281**, 119539.
- 6 Y. Wen, D. Qu, L. An, X. Gao, W. Jiang, D. Wu, D. Yang, Z. Sun, *ACS Sustain Chem. Eng.*, 2018, **7**, 2343-2349.
- 7 Cai A, Wang Q, Chang Y, Wang X. *J. Alloys. Compds.*, 2017, **692**, 183-189.
- 8 Y. Xiao, G. Tian, W. Li, Y. Xie, B. Jiang, C. Tian, D. Zhao, H. Fu, *J. Am. Chem. Soc.*, 2019, **141**, 2508-2515.
- 9 Y. Wen, D. Qu, L. An, X. Gao, W. Jiang, D. Wu, D. Yang, Z. Sun, *ACS Sustain Chem. Eng.*, 2018, **7**, 2343-2349.
- 10 M. Cao, K. Wang, I. Tudela, X. Fan, *Appl. Surf. Sci.*, 2021, **536**, 147784.
- 11 Hu. P, Chen. C, Zeng. R., Xiang. J, Huang. Y, Hou. D, Li. Q, and Huang. Y., *Nano Energy.*, 2018, **50**, 376-382.
- 12 Wang. Y, Zhao. S., Zhang. Y., Fang. J., Zhou. Y., Yuan. S., Zhang. C. and Chen. W, *Appl. Surf. Sci.*, 2018, **440**, 258-265.
- 13 Fei. B, Tang. Y, Wang. X, Dong. X, Liang. J, Fei. X, Xu. L, Song. Y. and Zhang. F, *Mater. Res. Bull.*, 2018, **102**, 209-217.
